# Supplementary material for: Technical Note: A minimally invasive experimental system for p CO 2 manipulation in plankton cultures using passive gas exchange (atmospheric carbon control simulator)
Source: Copernicus journal article supplement (doi:10.5194/bg-14-2675-2017), 2017-05-29
Supplement: Supplementary file 1 [file bg-14-2675-2017-supplement.pdf]

Supplement of Biogeosciences, 14, 2675–2684, 2017  
<http://www.biogeosciences.net/14/2675/2017/>  
doi:10.5194/bg-14-2675-2017-supplement  
© Author(s) 2017. CC Attribution 3.0 License.

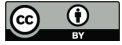

*Supplement of*

**Technical Note: A minimally invasive experimental system for  $p\text{CO}_2$  manipulation in plankton cultures using passive gas exchange (atmospheric carbon control simulator)**

**Brooke A. Love et al.**

*Correspondence to:* Brooke A. Love (brooke.love@wwu.edu)

The copyright of individual parts of the supplement might differ from the CC-BY 3.0 licence.

1 Gas Mixing System: Air is supplied by an oil free compressor (Powerex SES03 Oil free rotary scroll) with a 250 litre storage tank  
2 (Manchester Tank). It is possible to operate the system with small compressors (e.g. Dewalt 1.9 HP, oil free D55168) however reliability  
3 is an issue and the investment in a compressor rated for continuous operation is recommended. The storage tank is supplied with an  
4 automatic drain valve (Posi-drain). Again, manual draining of the storage tank is possible, but not recommended. Dry air is then passed  
5 through continuously regenerating CO<sub>2</sub> adsorbers (Puregas CAS2-11) at about 90-100 psi. A high precision regulator steps down the  
6 pressure to 30 psi as the CO<sub>2</sub> free air enters the MFCs (Sierra Instruments SmarTrak). The MFCs for air are capable of regulating flows  
7 up to 20 L min<sup>-1</sup>. A second set of MFCs receive pure research grade CO<sub>2</sub> at 30 psi and regulate flows up to 25 cc min<sup>-1</sup>. The two gas  
8 streams are mixed, and pass through a back pressure regulator (ControlAir 700BP) which ensures that the pressure on the outlet of the  
9 MFCs remains at a constant 15 psi.

10 Carbonate Verification: Samples for spectrophotometric pH are collected via 30 ml syringe to minimize gas exchange. They are very  
11 gently filtered through a pre-rinsed GFF filter (Whatman) because some cultures are optically dense enough to negatively impact  
12 spectrophotometric results. The first 5 ml of filtrate are discarded, and samples are syringe filtered slowly (about 10 ml/min) to minimize  
13 cell lysis. 15 ml vials are overflowed, again to minimize gas exchange in the sample. Recognized filtering methods via peristaltic pump  
14 (Bockmon and Dickson, 2014) are designed for large field samples and are not practical for a large number of small volume samples.  
15 The vials are brought to temperature (25 °C) in a temperature controlled water bath. Each sample is transferred via syringe to a water  
16 jacketed temperature controlled 5 cm cuvette, which is rinsed and then overflowed with the sample. The optical surfaces of the cuvette  
17 are cleaned with ethanol and lens paper. All other aspects of the measurement are according to the m-cresol blue method, with 20 µL  
18 of indicator used to achieve the appropriate level of absorbance on the Agilent 8453A UV-VIS diode array spectrophotometer (Dickson  
19 et al., 2007). This 5 cm cuvette was found to be a good compromise between the high precision but also high volume needed to use a  
20 10 cm cuvette and the difficult temperature control and repeatability for 1 cm cuvettes. The temperature stability of the water jacket  
21 outweighs the negative impact of increased sample handling necessary to produce high quality data.

22 DIC is determined using the Apollo Scitech DIC analyzer (AS-C3). A standard curve is run each day, using Dickson Certified Reference  
23 Material (Batch 148 and 152 for ACCS 1-4), corrected for density at ambient temperature. For each sample, 3 to 5 aliquots, each 0.75ml,  
24 are acidified with 10% phosphoric acid, degassed and analyzed for CO<sub>2</sub> via Licor 7700 NDIR instrument. When analyses match to

25 within 0.2%, the next sample is run. Density based on temperature and salinity allow the results in  $\mu\text{mol L}^{-1}$  from this volume based  
26 system to be converted to  $\mu\text{mol kg}^{-1}$ .

27 Samples for total alkalinity are preserved in 100 ml screw cap glass bottles with Teflon lined caps by the addition of 20 ul of saturated  
28 mercuric chloride. Total alkalinity is determined via open cell gran titration with 0.1 N HCl similar to Dickson (2007) using a Metrohm  
29 888 Titrando and PT1000 electrode. Temperature is controlled using a water jacketed beaker and burette. At least 2 titrations of Dickson  
30 Certified Reference Material (Batch 148 and 152 for ACCS 1-4) are carried out before samples. If resulting alkalinities are both within  
31  $5 \mu\text{mol kg}^{-1}$  of the certified value then samples are analysed, with additional reference material titrations periodically. Other carbonate  
32 parameters are calculated with CO2sys (Lewis and Wallace, 1998) using the constants of Mehrbach (1987) refit by Dickson (1987).

33

34 Table S1: Complete carbonate parameters for experiments 1-4. Values are mean across all days followed by the standard deviation in  
 35 parentheses. Samples were analysed in triplicate for pH and DIC on 2-10 days during each experiment, in rotation with development  
 36 jars, and other samples of interest. CO<sub>2</sub> partial pressure, total alkalinity and calcite saturation state were calculated using CO2sys.  
 37 Alkalinity data directly titrated are available on the BCO-DMO data repository. Under type, algae refers to the phytoplankton. Species  
 38 are listed in Table 2. The copepods are adult females.

| Experiment | Type                   | Treatment | Salinity<br>(ppt) | pCO <sub>2</sub><br>(uatm) | pH<br>(total) | Total Carbon<br>(umol/kg) | Total Alkalinity<br>(ueq/kg) | Ω Calcite | n  |
|------------|------------------------|-----------|-------------------|----------------------------|---------------|---------------------------|------------------------------|-----------|----|
| 1          | Algae                  | A         | 31.7 (0.7)        | 317 (27)                   | 8.11 (0.03)   | 1925 (17)                 | 2123 (18)                    | 3.6 (0.2) | 20 |
|            |                        | M         | 31.9 (0.7)        | 549 (94)                   | 7.90 (0.06)   | 1977 (23)                 | 2098 (31)                    | 2.4 (0.3) | 21 |
|            |                        | H         | 31.4 (0.5)        | 762 (159)                  | 7.77 (0.07)   | 2006 (28)                 | 2082 (41)                    | 1.8 (0.2) | 18 |
|            | Equilibration<br>tanks | A         | 31.2 (0.7)        | 417 (12)                   | 8.00 (0.01)   | 1916 (17)                 | 2063 (21)                    | 2.8 (0.1) | 31 |
|            |                        | M         | 31.3 (0.7)        | 811 (36)                   | 7.73 (0.02)   | 1996 (23)                 | 2059 (25)                    | 1.7 (0.1) | 29 |
|            |                        | H         | 31.2 (0.8)        | 1134 (132)                 | 7.60 (0.06)   | 2034 (22)                 | 2060 (30)                    | 1.3 (0.2) | 33 |
|            | Copepods               | A         | 31.1 (0.7)        | 596 (66)                   | 7.86 (0.04)   | 1966 (30)                 | 2066 (28)                    | 2.1 (0.2) | 27 |
|            |                        | M         | 31.1 (0.8)        | 1011 (89)                  | 7.64 (0.03)   | 2015 (32)                 | 2053 (30)                    | 1.4 (0.1) | 27 |
|            |                        | H         | 31.2 (0.8)        | 1307 (119)                 | 7.54 (0.04)   | 2036 (30)                 | 2045 (27)                    | 1.1 (0.1) | 26 |
| 2          | Algae                  | A         | 32.5 (1.3)        | 381 (19)                   | 7.85 (0.02)   | 1947 (42)                 | 2121 (55)                    | 3.2 (0.2) | 18 |
|            |                        | M         | 30.8 (0.4)        | 415 (16)                   | 7.8 (0.02)    | 1851 (33)                 | 1990 (36)                    | 2.6 (0.1) | 6  |
|            |                        | H         | 31.8 (0.8)        | 519 (21)                   | 7.73 (0.02)   | 1937 (25)                 | 2056 (27)                    | 2.4 (0.1) | 18 |
|            | Equilibration<br>tanks | A         | 32.7 (1.2)        | 1079 (39)                  | 7.46 (0.02)   | 2066 (53)                 | 2104 (60)                    | 1.4 (0.1) | 17 |
|            |                        | M         | 31.0 (0.0)        | 1153 (44)                  | 7.41 (0.01)   | 1967 (25)                 | 1986 (26)                    | 1.2 (0.)  | 6  |
|            |                        | H         | 31.7 (1.2)        | 1239 (45)                  | 7.4 (0.02)    | 2033 (19)                 | 2049 (23)                    | 1.2 (0.1) | 18 |
|            | Copepods               | A         | 32.6 (1.2)        | 777 (29)                   | 7.58 (0.01)   | 2032 (56)                 | 2107 (64)                    | 1.8 (0.1) | 18 |
|            |                        | M         | 31.4 (0.5)        | 844 (47)                   | 7.53 (0.02)   | 1953 (36)                 | 2007 (35)                    | 1.5 (0.)  | 8  |
|            |                        | H         | 31.5 (1.2)        | 930 (36)                   | 7.51 (0.02)   | 2003 (21)                 | 2050 (25)                    | 1.5 (0.1) | 18 |

| Experiment | Type                   | Treatment | Salinity<br>(ppt) | pCO <sub>2</sub><br>(uatm) | pH<br>(total) | Total Carbon<br>(umol/kg) | Total Alkalinity<br>(ueq/kg) | Ω Calcite | n  |
|------------|------------------------|-----------|-------------------|----------------------------|---------------|---------------------------|------------------------------|-----------|----|
| 3          | Algae                  | A         | 31.7 (0.7)        | 317 (27)                   | 8.11 (0.03)   | 1925 (17)                 | 2123 (18)                    | 3.6 (0.2) | 20 |
|            |                        | M         | 31.9 (0.7)        | 549 (94)                   | 7.9 (0.06)    | 1977 (23)                 | 2098 (31)                    | 2.4 (0.3) | 21 |
|            |                        | H         | 31.4 (0.5)        | 762 (159)                  | 7.77 (0.07)   | 2006 (28)                 | 2082 (41)                    | 1.8 (0.2) | 18 |
|            | Equilibration<br>tanks | A         | 31.2 (0.7)        | 417 (12)                   | 8.00 (0.01)   | 1916 (17)                 | 2063 (21)                    | 2.8 (0.1) | 31 |
|            |                        | M         | 31.3 (0.7)        | 811 (36)                   | 7.73 (0.02)   | 1996 (23)                 | 2059 (25)                    | 1.7 (0.1) | 29 |
|            |                        | H         | 31.2 (0.8)        | 1134 (132)                 | 7.60 (0.06)   | 2034 (22)                 | 2060 (30)                    | 1.3 (0.2) | 33 |
|            | Copepods               | A         | 31.1 (0.7)        | 596 (66)                   | 7.86 (0.04)   | 1966 (30)                 | 2066 (28)                    | 2.1 (0.2) | 27 |
|            |                        | M         | 31.1 (0.8)        | 1011 (89)                  | 7.64 (0.03)   | 2015 (32)                 | 2053 (30)                    | 1.4 (0.1) | 27 |
|            |                        | H         | 31.2 (0.8)        | 1307 (119)                 | 7.54 (0.04)   | 2036 (30)                 | 2045 (27)                    | 1.1 (0.1) | 26 |
| 4          | Algae                  | A         | 33 (1.3)          | 381 (19)                   | 8.04 (0.02)   | 1947 (42)                 | 2121 (55)                    | 3.2 (0.2) | 18 |
|            |                        | M         | 30.8 (0.4)        | 415 (16)                   | 7.99 (0.02)   | 1851 (33)                 | 1990 (36)                    | 2.6 (0.1) | 6  |
|            |                        | H         | 31.8 (0.8)        | 519 (21)                   | 7.91 (0.02)   | 1937 (25)                 | 2056 (27)                    | 2.4 (0.1) | 18 |
|            | Equilibration<br>tanks | A         | 32.6 (1.2)        | 777 (29)                   | 7.76 (0.02)   | 2032 (56)                 | 2107 (64)                    | 1.8 (0.1) | 18 |
|            |                        | M         | 31.4 (0.5)        | 844 (47)                   | 7.71 (0.02)   | 1953 (36)                 | 2007 (35)                    | 1.5 (0.)  | 8  |
|            |                        | H         | 31.5 (1.2)        | 930 (36)                   | 7.68 (0.02)   | 2003 (21)                 | 2050 (25)                    | 1.5 (0.1) | 18 |
|            | Copepods               | A         | 32.7 (1.2)        | 1079 (39)                  | 7.62 (0.02)   | 2066 (53)                 | 2104 (60)                    | 1.4 (0.1) | 17 |
|            |                        | M         | 31. (0.)          | 1153 (44)                  | 7.58 (0.02)   | 1967 (25)                 | 1986 (26)                    | 1.2 (0.)  | 6  |
|            |                        | H         | 31.7 (1.2)        | 1239 (45)                  | 7.56 (0.02)   | 2033 (19)                 | 2049 (23)                    | 1.2 (0.1) | 18 |

40  
41  
42  
43  
44  
45  
46  
47  
48  
49  
50  
51  
52  
53  
54  
55

Table S2: Mean pH (standard deviation) of cultures of *Emiliana huxleyi* with varying volumes in the flask (n=3), resulting in surface area to volume ratios of 162, 161 and 90 cm<sup>2</sup>/L for 500, 700 and 900 ml respectively. Cell density did not vary significantly between treatments.

| Sample | Days of Growth |        |        |        |      |        |      |        |      |        |
|--------|----------------|--------|--------|--------|------|--------|------|--------|------|--------|
|        | 1              |        | 2      |        | 3    |        | 4    |        | 5    |        |
| Blank  | 7.71           | (0.01) | 7.72   | (0.02) | 7.76 | (0.00) | 7.72 | (0.01) | 7.75 | (0.00) |
| 500 ml | 7.76           | (0.01) | 7.82   | (0.01) | 7.85 | (0.01) | 7.93 | (0.01) | 7.97 | (0.01) |
| 700 ml | 7.77           | (0.02) | 7.8167 | (0.02) | 7.87 | (0.01) | 7.98 | (0.01) | 8.09 | (0.01) |
| 900 ml | 7.76           | (0.01) | 7.80   | 0.01   | 7.88 | (0.01) | 8.03 | (0.03) | 8.18 | (0.02) |

References Cited in Supplement:

Bockmon, E. E. and Dickson, A. G.: A seawater filtration method suitable for total dissolved inorganic carbon and pH analyses, *Limnol. Oceanogr. Methods*, 12, 191–195 [online] Available from: <http://scrippschemists.ucsd.edu/adickson/content/seawater-filtration-method-suitable-total-dissolved-inorganic-carbon-and-ph-analyses>, 2014.

Dickson, A. G., Sabine, C. L. and Christian, J. R.: *Guide to best practices for ocean CO<sub>2</sub> measurements*, Edited Book, PICES, Sydney., 2007.

Lewis, E. and Wallace, D. W. R.: Program developed for CO<sub>2</sub> system calculations, ORNL/CDIAC-105, , 38, 1998.
